# Supplementary material
Source: PubMed Central journal article supplement (PMC5784060)
Supplement: rstb20160440supp2.pdf [file rstb20160440supp2.pdf]

## 1 **Box 2: Methodological approaches to telomerase activity measurement**

2 As interest in telomere dynamics for ecology and evolution has increased so too has the need for  
3 simple and effective methods for estimating telomerase activity. Much of the early work for  
4 telomerase detection was borne from the fields of cancer research where accurate estimation of  
5 activity is essential for tumor diagnostics and the search for anti-tumor drugs with telomerase  
6 inhibition properties.

7 The methods for telomerase measurement basically fall into two separate categories: those based on  
8 the signals arising directly from telomerase products (no PCR); and others based on the detection of  
9 signals from DNA products of telomerase via an amplification step (PCR-based). All methods have  
10 advantages and disadvantages, particularly in terms of sensitivity, cost, and specialized equipment  
11 required. The decision of which method to adopt will vary according to the application and resources  
12 of individual labs. Although all of the methods below were initially developed to screen purified cell  
13 lines for telomerase activity, they have also been shown to be applicable to tissue lysate in species  
14 ranging from protozoans to mammals and from diverse starting materials including tumor biopsies,  
15 liver, muscle and even human urine [1]. Preparation typically involves homogenization of cells or  
16 tissues in lysis buffer with the lysate either used immediately or stored at -80°C for later measurement.

17 The non-PCR methods include the use of **surface plasmon resonance (SPR)** to detect small local  
18 changes in the refractive index of a surface with telomere oligonucleotides attached [2]. In this method  
19 the surface bound telomere oligonucleotides are treated with cell lysate. In the presence of active  
20 telomerase, the oligo nucleotides are extended and the refractive index of the chip surface is altered  
21 compared to the baseline control. The method has excellent sensitivity with the ability to detect 20-  
22 100 telomerase-active cells against a background of 1000-fold excess of telomerase-negative cells. In  
23 its present form however, it has the disadvantage that it requires the use of the specialized BIACORE™  
24 system and expensive biotin-conjugated primers. A similar strategy is employed by the **silicon**  
25 **microring resonator** technique [3] which immobilizes the telomere oligonucleotides on silicon rings

1 housed in a photonic chip, before lysate is applied and light resonance measurements are compared  
2 to baseline controls. This method has increased sensitivity (up to 10 active cells/ uL) and a simplified  
3 workflow but still requires the use of specialized equipment not necessarily available to all  
4 laboratories. An alternative non-PCR method is the use of **magnetic nanoparticles** that switch their  
5 magnetic state once they are annealed to telomerase-extended oligonucleotide repeats [4, 5]. The  
6 method is extremely sensitive with the ability to detect telomerase activity from a few as 10 active  
7 cells and can be automated for high-throughput processing in a 384 well format. A drawback once  
8 again however is the specialized equipment and reagents in the form of a NMR spectrometer and a set  
9 of nanosensors covalently bound to telomere oligonucleotides that are needed for the assay.

10 The PCR-based methods are dominated by myriad variants of the **telomeric repeat amplification**  
11 **protocol (TRAP)**. In its original form [6], this assay involves three steps. First, cell lysate is added to a  
12 telomere-imitating oligonucleotide which will elongate if telomerase is present. Second, PCR  
13 amplification is performed with the oligonucleotides as a template and using primers specific to the  
14 elongated extension product. Different labelling methods can be incorporated at this stage to enable  
15 the final step of detection. Detection can be carried out via gel electrophoresis and radioactive or  
16 fluorescent imaging. Initial versions of the assay suffered from problems of non-specific primer binding  
17 leading to false positive signals and high background noise. Refinements and modifications [7, 8] have  
18 largely overcome these issues and the assay can now achieve particularly high sensitivity with  
19 detection limits between 10 and 50 telomerase active cells depending on the particular assay variant  
20 adopted. Commercial kits are available for TRAP assays including TRAPeze (EMD Millipore) and other  
21 ELISA-based methods (eg. Aviva Systems) which facilitate the routine adoption of telomerase  
22 measurement for most labs. This convenience can sometimes be a trade-off with sensitivity which can  
23 be compromised with universal type kits. A promising variant of the TRAP protocol is the **droplet digital**  
24 **TRAP (ddTRAP)** assay [9] which incorporates ddPCR technology into the detection step of the TRAP  
25 protocol and allows highly sensitive (as low as one telomerase-positive cell equivalent) and absolute

1 quantification of telomerase activity, doing away with the need for control cell lines as internal  
2 standards.

3

#### 4 **References**

- 5 [1] Skvortsov, D.A., Zvereva, M.E., Shpanchenko, O.V. & Dontsova, O.A. 2011 Assays for Detection of  
6 Telomerase Activity. *Acta Naturae* **3**, 48-68.
- 7 [2] Maesawa, C., Inaba, T., Sato, H., Iijima, S., Ishida, K., Terashima, M., Sato, R., Suzuki, M., Yashima,  
8 A., Ogasawara, S., et al. 2003 A rapid biosensor chip assay for measuring of telomerase activity using  
9 surface plasmon resonance. *Nucleic acids research* **31**, e4-e4.
- 10 [3] Kim, K.W., Shin, Y., Perera, A.P., Liu, Q., Kee, J.S., Han, K., Yoon, Y.-J. & Park, M.K. 2013 Label-free,  
11 PCR-free chip-based detection of telomerase activity in bladder cancer cells. *Biosensors and*  
12 *Bioelectronics* **45**, 152-157.
- 13 [4] Grimm, J., Perez, J.M., Josephson, L. & Weissleder, R. 2004 Novel Nanosensors for Rapid Analysis  
14 of Telomerase Activity. *Cancer Research* **64**, 639-643.
- 15 [5] Perez, J.M. & Kaittanis, C. 2008 Magnetic nanosensors for probing molecular interactions. , .  
16 *Nanoparticles in Biomedical Imaging*, 183-197.
- 17 [6] Kim, N.W., Piatyszek, M.A., Prowse, K.R. & Harley, C.B. 1994 Specific association of human  
18 telomerase. *Science* **266**, 2011.
- 19 [7] Aldous, W.K. & Grabill, N.R. 1997 A fluorescent method for detection of telomerase activity.  
20 *Diagnostic Molecular Pathology* **6**, 102-110.
- 21 [8] Elmore, L.W., Norris, M.W., Sircar, S., Bright, A.T., McChesney, P.A., Winn, R.N. & Holt, S.E. 2008  
22 Upregulation of Telomerase Function During Tissue Regeneration. *Exp Biol Med* **233**, 958.  
23 (doi:10.3181/0712-RM-345).
- 24 [9] Ludlow, A.T., Robin, J.D., Sayed, M., Litterst, C.M., Shelton, D.N., Shay, J.W. & Wright, W.E. 2014  
25 Quantitative telomerase enzyme activity determination using droplet digital PCR with single cell  
26 resolution. *Nucleic Acids Research* **42**, e104-e104. (doi:10.1093/nar/gku439).
