# Supplementary material
Source: PubMed Central journal article supplement (PMC5784060)
Supplement: rstb20160440supp3.pdf [file rstb20160440supp3.pdf]

**Box 3: Families of currently known *in vivo* modulators of telomerase activity.**

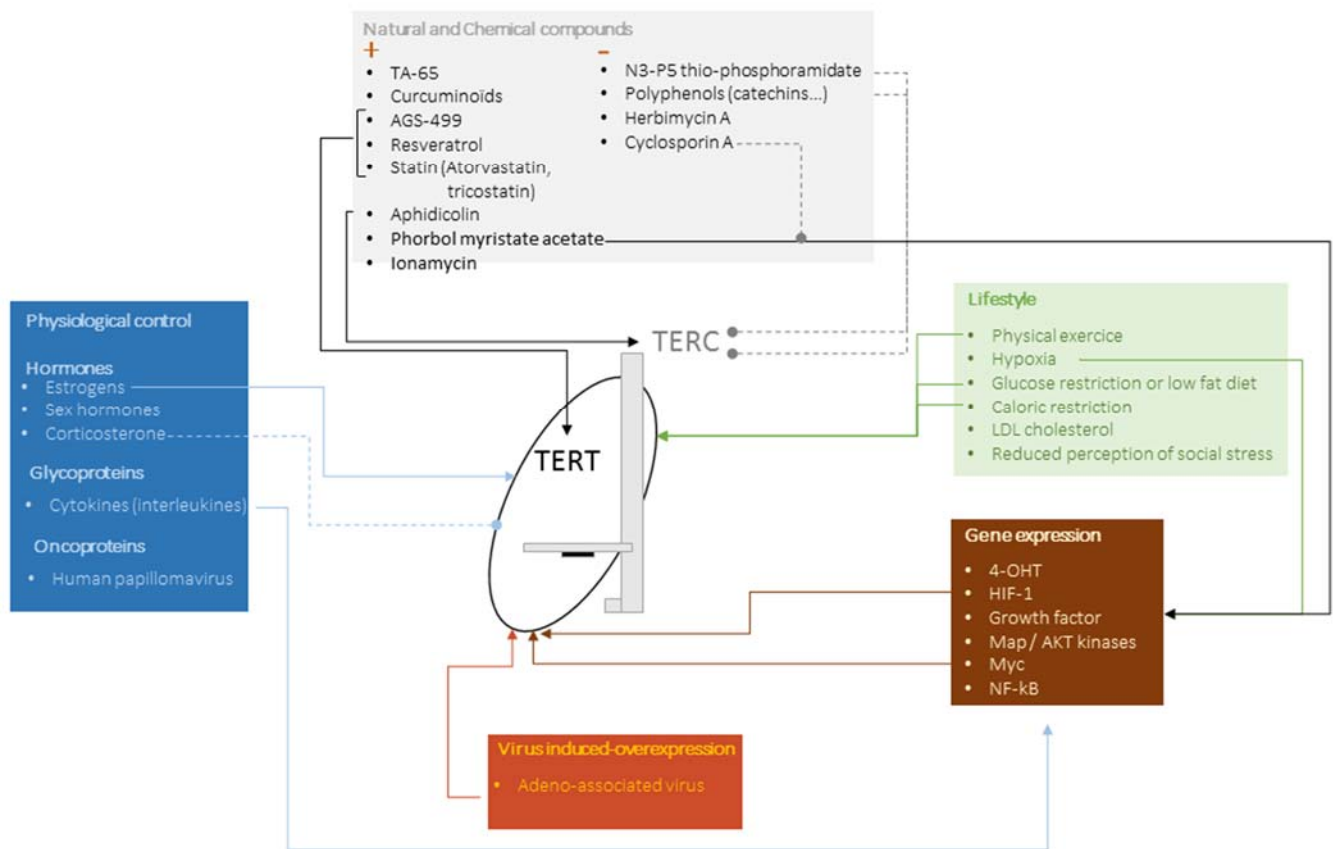

Colored boxes represent five candidate categories for telomerase modulation, via natural and chemical compounds; lifestyle; gene expression; virus-induced overexpression; or physiological control. Arrows indicate when the specific activation effect is known to be mediated through TERC (RNA) or TERT (protein) components of telomerase. Plain arrows highlight pathways of activation impact while dashed arrows underline inhibition impact pathways. Most of the activation pathways are related to TERT – AGS-499 [1]; Resveratrol [2, 3]; Statin [4]; physical exercise [5]; dietary restriction [6] but see [7]; adeno-associated viruses [8]; and estrogens [9]; phorbol myristate acetate [10]; hypoxia [11]; and cytokines [12] –, whereas only aphidicolin has been shown to activate TERC [13]. Polyphenols [14] and N3-P5 thio-phosphoramidate [15] both inhibit TERC while corticosterone has an inhibitory effect on TERT [16]. Cyclosporin A has an inhibitory effect on the phorbol myristate acetate pathway [10].

## References

- [1] Tichon, A., Eitan, E., Kurkalli, B.G., Braiman, A., Gazit, A., Slavin, S. & Priel, E. 2013 Oxidative stress protection by novel telomerase activators in mesenchymal stem cells derived from healthy and diseased individuals. *Current molecular medicine* **13**, 1010-1022.
- [2] Wang, X.b., Zhu, L., Huang, J., Yin, Y.-g., Kong, X.-q., Rong, Q.-f., Shi, A.-w. & Cao, K.-j. 2011 Resveratrol-induced augmentation of telomerase activity delays senescence of endothelial progenitor cells. *Chin Med J* **124**, 4310-4315. (doi:10.3760/cma.j.issn.0366-6999.2011.24.033).
- [3] Jaskelioff, M., Muller, F.L., Paik, J.-H., Thomas, E., Jiang, S., Adams, A.C., Sahin, E., Kost-Alimova, M., Protopopov, A., Cadiñanos, J., et al. 2010 Telomerase reactivation reverses tissue degeneration in aged telomerase-deficient mice. *Nature*. (doi:10.1038/nature09603).
- [4] Boccardi, V., Barbieri, M., Rizzo, M.R., Marfella, R., Esposito, A., Marano, L. & Paolisso, G. 2013 A new pleiotropic effect of statins in elderly: modulation of telomerase activity. *The FASEB Journal* **27**, 3879-3885. (doi:10.1096/fj.13-232066).
- [5] Werner, C., Hanhoun, M., Widmann, T., Kazakov, A., Semenov, A., Pöss, J., Bauersachs, J., Thum, T., Pfreundschuh, M. & Müller, P. 2008 Effects of Physical Exercise on Myocardial Telomere-Regulating Proteins, Survival Pathways, and Apoptosis. *Journal of the American College of Cardiology* **52**, 470-482. (doi:10.1016/j.jacc.2008.04.034).
- [6] Pendergrass, W., Penn, P., Li, J. & Wolf, N. 2001 Age-related telomere shortening occurs in lens epithelium from old rats and is slowed by caloric restriction. *Experimental Eye Research* **73**, 221-228.
- [7] Smith, D.L., Mattison, J.A., Desmond, R.A., Gardner, J.P., Kimura, M., Roth, G.S., Ingram, D.K., Allison, D.B. & Aviv, A. 2011 Telomere Dynamics in Rhesus Monkeys: No Apparent Effect of Caloric Restriction. *The Journals of Gerontology Series A: Biological Sciences and Medical Sciences* **66A**, 1163-1168. (doi:10.1093/gerona/qlr136).
- [8] Bernardes de Jesus, B., Vera, E., Schneeberger, K., Tejera, A.M., Ayuso, E., Bosch, F. & Blasco, M.A. 2012 Telomerase gene therapy in adult and old mice delays aging and increases longevity without increasing cancer. *EMBO Molecular Medicine* **4**, 691-704. (doi:10.1002/emmm.201200246).

- [9] Kyo, S., Takakura, M., Kanaya, T., Zhuo, W., Fujimoto, K., Nishio, Y., Orimo, A. & Inoue, M. 1999 Estrogen activates telomerase. *Cancer Research* **59**, 5917-5921.
- [10] Weng, N.-p., Levine, B.L., June, C.H. & Hodes, R.J. 1996 Regulated Expression of Telomerase Activity in Human T Lymphocyte Development and Activation. *The Journal of Experimental Medicine* **183**, 2471-2479.
- [11] Minamino, T., Mitsialis, S.A. & Kourembanas, S. 2001 Hypoxia Extends the Life Span of Vascular Smooth Muscle Cells through Telomerase Activation. *Molecular and Cellular Biology* **21**, 3336-3342. (doi:10.1128/mcb.21.10.3336-3342.2001).
- [12] Akiyama, M., Hideshima, T., Hayashi, T., Tai, Y.-T., Mitsiades, C.S., Mitsiades, N., Chauban, D., Richardson, P., Munshi, N.C. & Anderson, K.C. 2002 Cytokines modulate telomerase activity in a human multiple myeloma cell line. *Cancer Research* **62**, 3876-3882.
- [13] Bodnar, A.G., Kim, N.W., Effros, R.B. & Chiu, C.-P. 1996 Mechanism of telomerase induction during T cell activation. *Experimental Cell Research* **228**, 58-64.
- [14] Naasani, I., Oh-hashii, F., Oh-hara, T., Feng, W., Johnston, J., Chan, K. & Tsuruo, T. 2003 Blocking telomerase by dietary polyphenols is a major mechanisms for limiting the growth of human cancer cells *in vitro* and *in vivo*. *Cancer Research* **63**, 824-830.
- [15] Herbert, B.-S., Gellert, G.C., Hochreiter, A., Pongracz, K., Wright, W.E., Zielinska, D., Chin, A.C., Harley, C.B., Shay, J.W. & Gryaznov, S.M. 2005 Lipid modification of GRN163, an N3' → P5' thio-phosphoramidate oligonucleotide, enhances the potency of telomerase inhibition. *Oncogene* **24**, 5262-5268. (doi:10.1038/sj.onc.1208760).
- [16] Choi, J., Fauce, S.R. & Effros, R.B. 2008 Reduced telomerase activity in human T lymphocytes exposed to cortisol. *Brain, Behavior, and Immunity* **22**, 600-605. (doi:10.1016/j.bbi.2007.12.004).
